# Supplementary material for: The Role of Lengthscale in the Creep of Sn-3Ag-0.5Cu Solder Microstructures
Source: Springer Nature journal article supplement (doi:10.1007/s11664-020-08697-4), 2021-01-16
Supplement: MOESM1 [file 18774088]

Supplementary Material for: “**The role of lengthscale in the creep of Sn-3Ag-0.5Cu solder microstructures**”

Tianhong Gu\*, Christopher M. Gourlay, and T. Ben Britton

Department of Materials, Imperial College London, SW7 2AZ. UK

\*Corresponding author: [t.gu15@imperial.ac.uk](mailto:t.gu15@imperial.ac.uk)

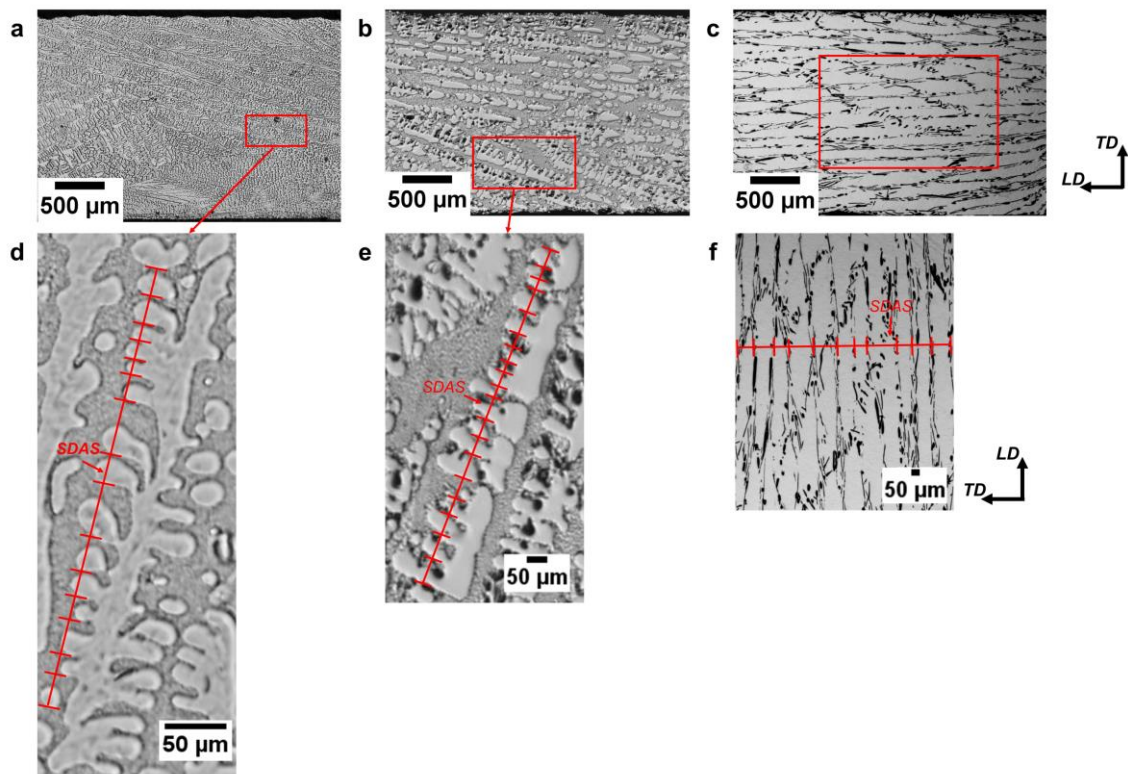

**Figure S1.** Optical images of polished DS SAC305 samples in longitudinal direction. (a, d) The fine-structured sample at growth velocity of  $200 \mu\text{m/s}$ , (b, e) the medium-structured sample at growth velocity of  $20 \mu\text{m/s}$ , (c, f) the coarse-structured sample at growth velocity of  $2 \mu\text{m/s}$ . (d, e, f) The higher magnification images of the red-squared region in (a – c) show the dendrite arms with the secondary dendrite arm spacing (SDAS,  $\lambda_2$ ) measured. The SDAS is determined by  $\lambda_2 = \frac{L}{N}$  where  $L$  is the length of the intersection line and  $N$  is the number of intersections of the line. The SDAS was calculated as a mean value by measuring four micrographs and the standard deviation (STD) of the value is given in Table I below.

| Growth velocity, $v$ ( $\mu\text{m/s}$ ) | Length, $L$ ( $\mu\text{m}$ ) | Number, $N$ | SDAS, $\lambda_2 = \frac{L}{N}$ ( $\mu\text{m}$ ) |             |
|------------------------------------------|-------------------------------|-------------|---------------------------------------------------|-------------|
|                                          |                               |             | Average                                           | STD         |
| 20                                       | 848                           | 17          | 49.9                                              | 49.9<br>2.9 |
|                                          | 683                           | 13          | 52.5                                              |             |
|                                          | 857                           | 19          | 45.1                                              |             |
|                                          | 883                           | 17          | 51.9                                              |             |
| 200                                      | 335                           | 15          | 22.3                                              | 20.4<br>3.2 |
|                                          | 226                           | 12          | 18.8                                              |             |
|                                          | 96                            | 6           | 16.0                                              |             |
|                                          | 340                           | 14          | 24.3                                              |             |

**Table I.** Summary of SDAS ( $\lambda_2$ ) of the DS samples.

The spacing of rod eutectic morphology can be measured according to Flood and Hunt <sup>[1]</sup> as

$$0.5\lambda_e = S^r = 0.4 \left( \frac{A}{N} \right)^{0.5}$$

Where  $\lambda_e$  is the eutectic spacing in  $\mu\text{m}$  and  $\frac{N}{A}$  is the number of IMC rods per unit area. A fixed area,  $A$  is selected and measured by Image J <sup>[2]</sup>. The number of particles,  $N$  are counted manually from Figure 1 in the manuscript.

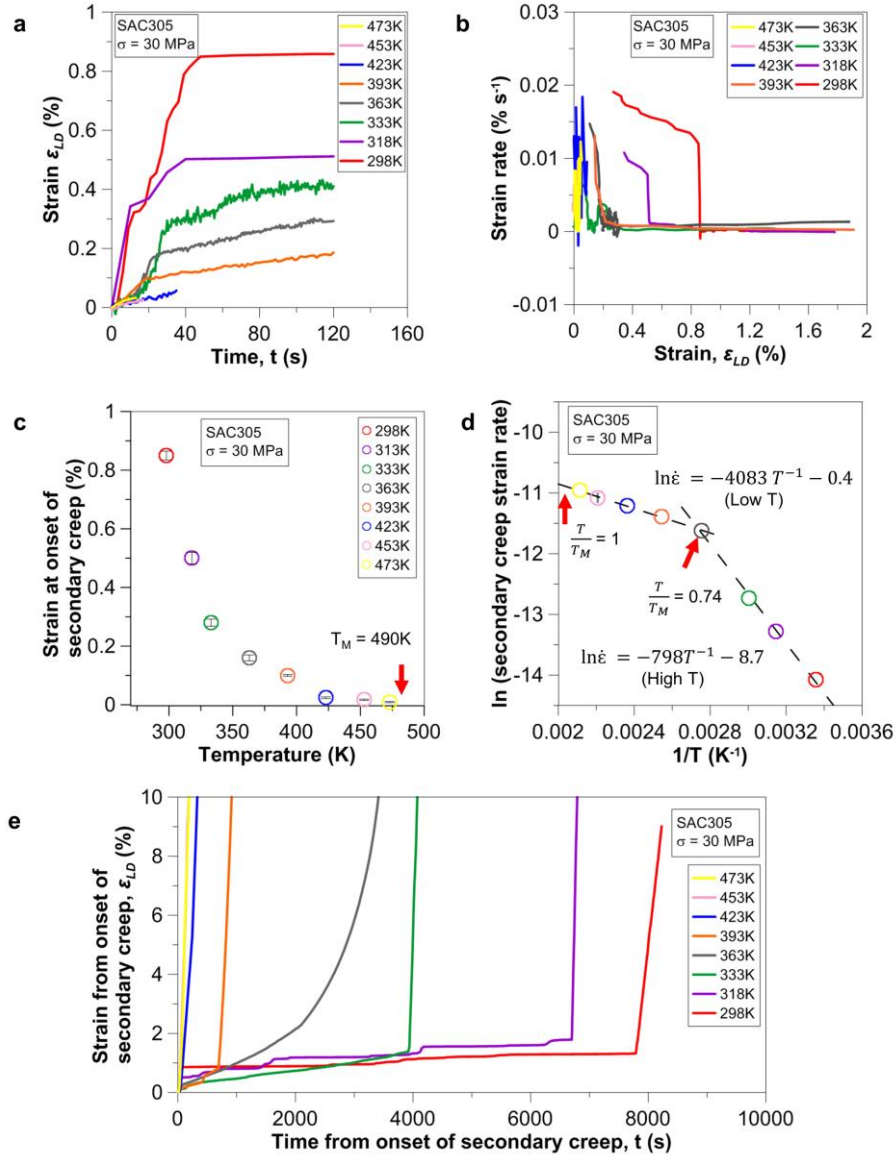

**Figure S2.** Fixed load (30 MPa) mechanical creep data from 298 to 473 K of fine-structured SAC305 samples grown at  $v=200 \mu\text{m/s}$ . (a) Creep curves from 298 to 473 K from primary to early secondary creep. (b) Creep strain rate vs. creep strain curves showing a gradient of 0 after the secondary stage creep is reached. (c) Variation of the onset of secondary creep with respect to temperature. (d) Creep model analysis of  $\ln$  (secondary creep strain rate) vs. reciprocal temperature with two creep domains (high temperature and low temperature). (e) Creep curves from the onset of secondary to tertiary stage creep (maximum strain = 10%). (The orientation information is given in **Table II**).

| T [K] | Strain at onset of secondary creep (%) | Secondary creep strain rate ( $s^{-1}$ ) | Failure creep strain (%) | Number of $\beta$ -Sn grains | $\beta$ -Sn Orientation measured by EBSD |
|-------|----------------------------------------|------------------------------------------|--------------------------|------------------------------|------------------------------------------|
| 298   | 0.85                                   | $7.71 \times 10^{-7}$                    | 9.0                      | 1                            | [110]                                    |
| 318   | 0.50                                   | $1.71 \times 10^{-6}$                    | 26.2                     | 2                            | [110] [100]                              |
| 333   | 0.28                                   | $2.96 \times 10^{-6}$                    | 38.5                     | 2                            | [110] [110]                              |
| 363   | 0.16                                   | $8.98 \times 10^{-6}$                    | 22.7                     | 3                            | [110][110][100]                          |
| 393   | 0.10                                   | $1.13 \times 10^{-5}$                    | 25.8                     | 3                            | [110] [110] [110]                        |
| 423   | 0.03                                   | $1.35 \times 10^{-5}$                    | 29.8                     | 2                            | [110] [100]                              |
| 453   | 0.02                                   | $1.54 \times 10^{-5}$                    | 21.6                     | 2                            | [110] [110]                              |
| 473   | 0.01                                   | $1.74 \times 10^{-5}$                    | 21.2 (not fractured)     | 3                            | [110] [110] [100]                        |

**Table II.** Summary of fine-structured SAC305 mechanical creep samples under fixed load of  $\sim 30$  MPa testing from 298 to 473K showing the values of secondary creep strain rate, strain at the onset of secondary creep, failure creep strain and grain orientation of the samples.

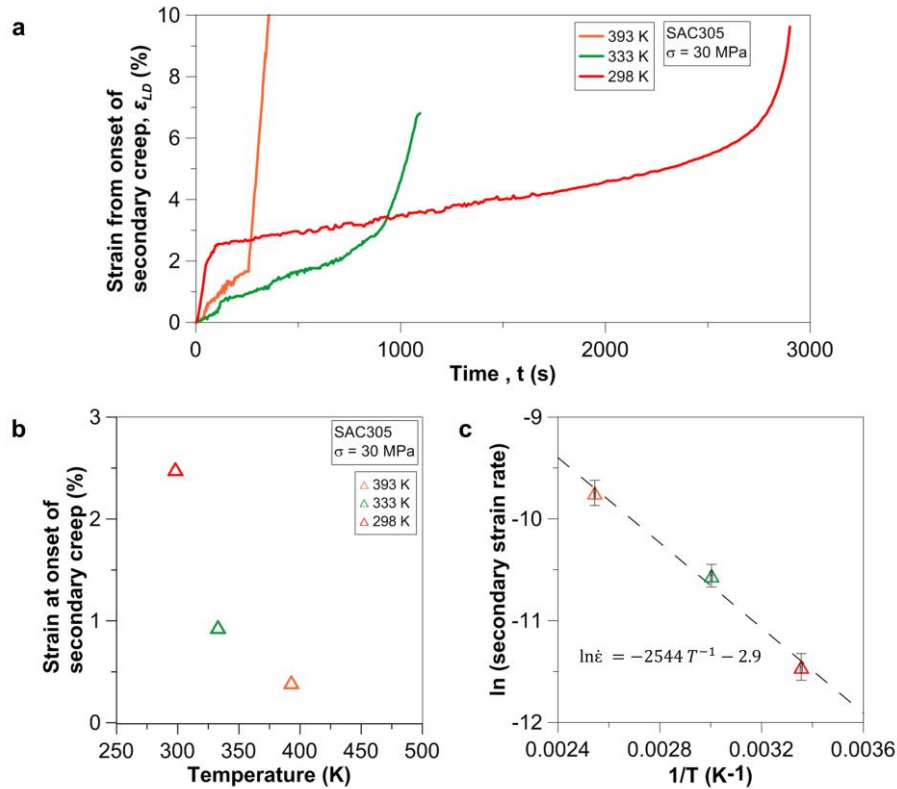

**Figure S3.** Fixed load (30 MPa) mechanical creep data from 298 to 473 K of coarse-structured SAC305 samples grown at  $v=2 \mu\text{m/s}$ . (a) Creep curves from 298 to 393 K (maximum strain = 10%). (b) Variation of the onset of secondary creep with respect to temperature. (c) Creep model analysis of  $\ln$  (secondary creep strain rate) vs. reciprocal temperature. (The orientation information is given in **Table III**).

| T [K] | Strain at onset of secondary creep (%) | Secondary creep strain rate (s <sup>-1</sup> ) | Failure creep strain (%) | Number of $\beta$ -Sn grains | $\beta$ -Sn Orientation measured by EBSD |
|-------|----------------------------------------|------------------------------------------------|--------------------------|------------------------------|------------------------------------------|
| 298   | 2.42                                   | $1.06 \times 10^{-5}$                          | 9.6                      | 1                            | [110]                                    |
| 333   | 0.94                                   | $2.60 \times 10^{-5}$                          | 6.8                      | 4                            | [100] [110]<br>[110][110]                |
| 393   | 0.40                                   | $5.86 \times 10^{-5}$                          | 14.8                     | 3                            | [100] [110] [110]                        |

**Table III.** Summary of coarse-scaled SAC305 mechanical creep samples under fixed load of ~30 MPa testing from 298 to 393 K showing the values of secondary creep strain rate, strain at the onset of secondary creep, failure creep strain and grain orientation of the samples.

|    | Slip system | CRSS ratio | weighted Schmid factor $m_w$ [110] |
|----|-------------|------------|------------------------------------|
| 3  | (110)[001]  | 1          | 0.28                               |
| 5  | (100)[010]  | 1.05       | 0.49                               |
| 6  | (010)[100]  | 1.05       | 0.44                               |
| 13 | (010)[101]  | 1.25       | 0.40                               |
| 15 | (100)[011]  | 1.25       | 0.40                               |

**Table IV.** The common Sn slip systems<sup>[3]</sup> with the highest five weighted Schmid factors. The values of  $m_w$  are calculated. The values of CRSS (critical resolved shear stress) ratio are estimated from by Zamiri et al.<sup>[4]</sup> The values of weighted Schmid factor ( $m_w$ ) are calculated using equation  $m_{w^i} = \frac{\tau_{CRSS^i}}{\tau_{CRSS^{Min}}}$  for [110] orientation along [100] loading direction.

1. S.C. Flood and J.D. Hunt, *Modification of Al-Si eutectic alloys with Na*. Metal science, 1981. **15**(7): p. 287-294.
2. C.T. Rueden, J. Schindelin, M.C. Hiner, B.E. DeZonia, A.E. Walter, E.T. Arena and K.W. Eliceiri, *ImageJ2: ImageJ for the next generation of scientific image data*. BMC bioinformatics, 2017. **18**(1): p. 529.
3. M. Fujiwara and T. Hirokawa, *The strength of Main obstacles to dislocation motion in white tin crystals*. J. Jpn. Inst. Met., 1987. **51**(9): p. 830-838.
4. A. Zamiri, T.R. Bieler and F. Pourboghraat, *Anisotropic crystal plasticity finite element modeling of the effect of crystal orientation and solder joint geometry on deformation after temperature change*. Journal of electronic materials, 2009. **38**(2): p. 231-240.
